# Supplementary material for: Silicon Promotes Exodermal Casparian Band Formation in Si-Accumulating and Si-Excluding Species by Forming Phenol Complexes
Source: PubMed Central journal article supplement (PMC4575055; doi:10.1371/journal.pone.0138555), 2015-09-18

**Figure S1. Amounts of aliphatic suberin compounds in the outer cell layers of rice (A), maize (B) and onion (C) roots.**

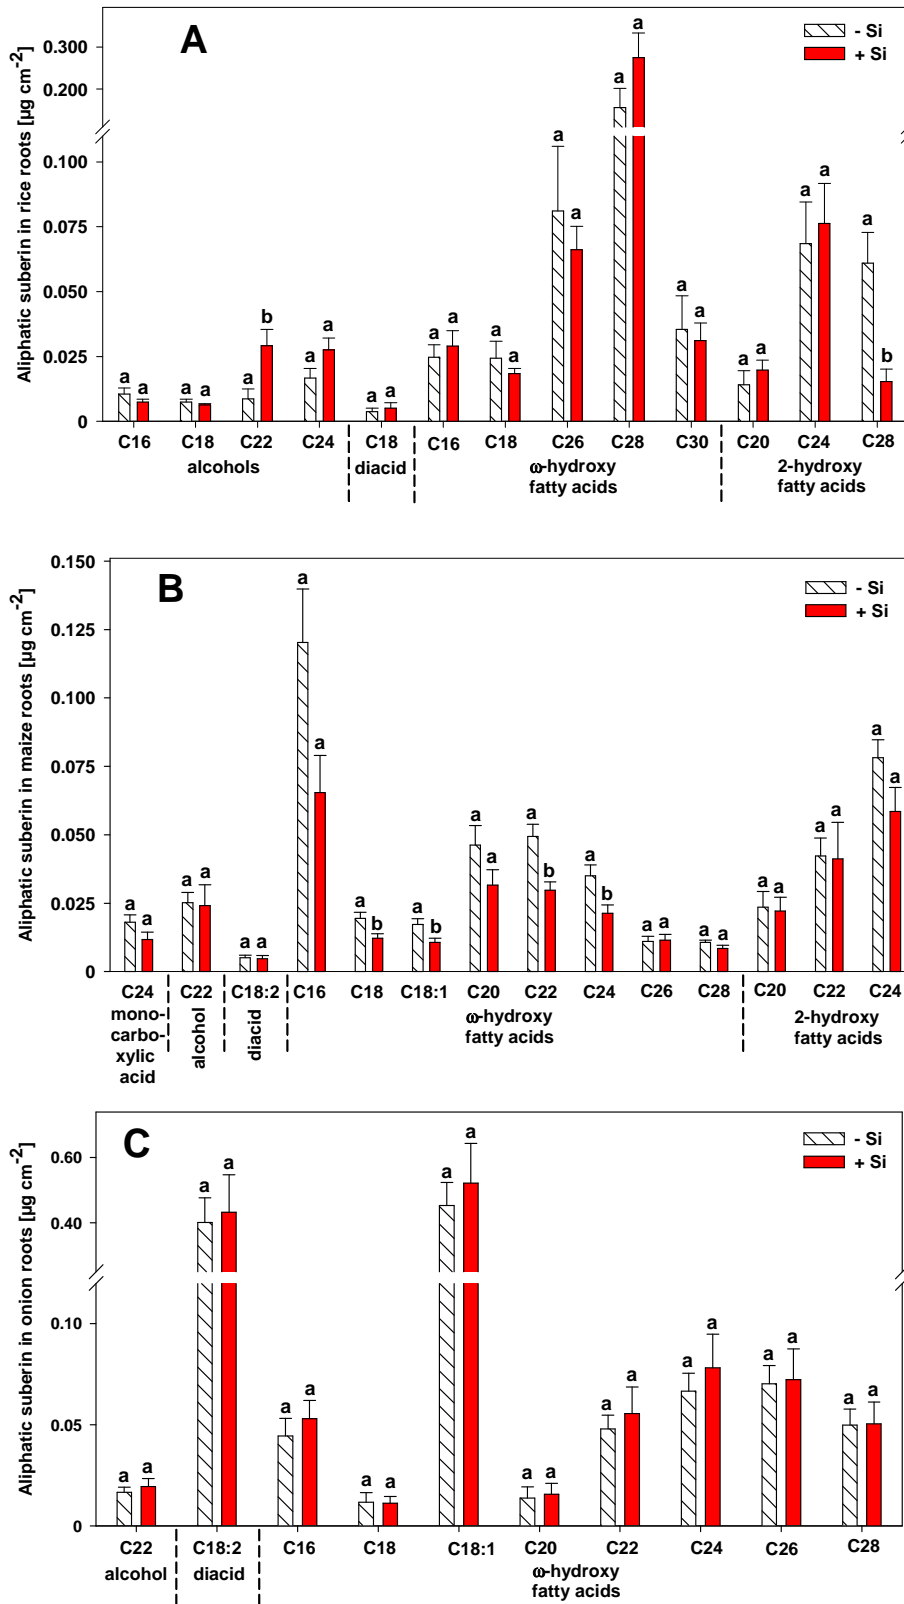

Supplement: pone.0138555.s001.pdf [file pone.0138555.s001.pdf]
