# Supplementary material for: Silicon Promotes Exodermal Casparian Band Formation in Si-Accumulating and Si-Excluding Species by Forming Phenol Complexes
Source: PubMed Central journal article supplement (PMC4575055; doi:10.1371/journal.pone.0138555), 2015-09-18

**Figure S3. Development of Casparian bands (CB) in the exodermis of nug plants as affected by Si supply.**

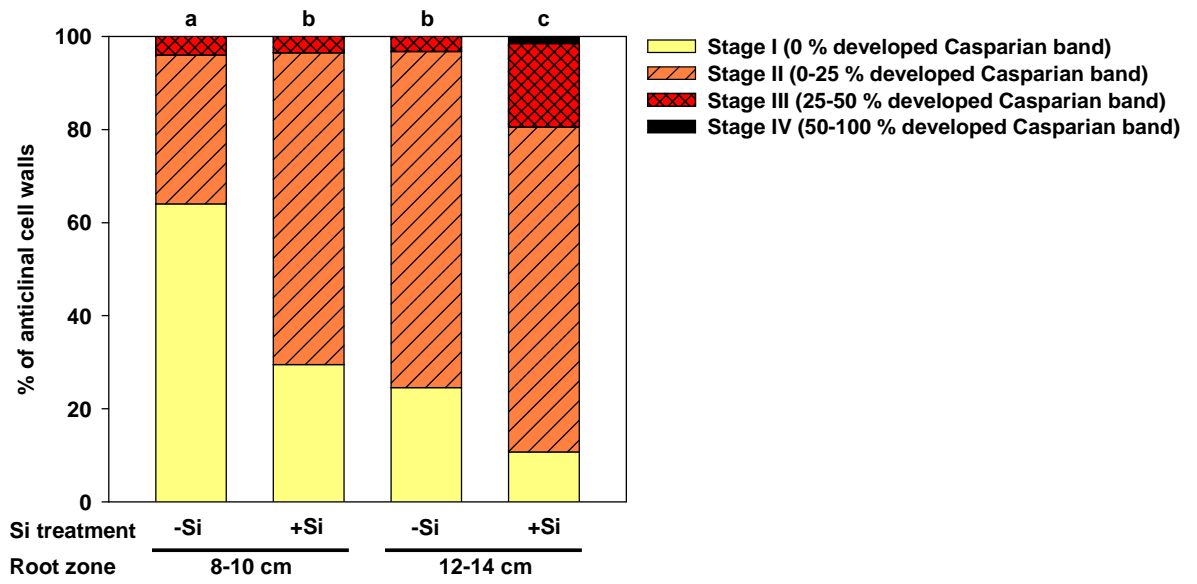

Supplement: pone.0138555.s003.pdf [file pone.0138555.s003.pdf]
